# Supplementary material
Source: Springer Nature journal article supplement (https://www.springermedizin.de/resource/supplementary/12879_2011_1706_MOESM1_ESM.pdf/9443616)
Supplement: MOESM1 [file 9443616]

111 households randomised

Control Group

(n=35)

Excluded (n=5)

- symptom onset > 2d (n=2)
- co-infection (n=3)

Analysed

n = 30

n Index=30; n Contacts=82

Mask Group

(n=37)

Excluded (n=11)

- negative influenza PCR (n=2)
- declined to participate (n=2)
- unresolved custody (n=1)
- co-infection (n=6)

Analysed

n = 26

n Index=26; n Contacts=69

Mask & Hygiene

Group (n=39)

Excluded (n=11)

- co-infection (n=4)
- declined to participate (n=2)
- symptom onset > 2d (n=4)
- pregnancy (n=1)

Analysed

n = 28

n Index=28; n Contacts=67
